# Supplementary material for: Genetic Enhancement of Blast and Bacterial Leaf Blight Resistance in Rice Variety CO 51 through Marker-Assisted Selection
Source: MDPI journal article supplement (doi:10.3390/agriculture14050693), 2024-04-28
Supplement: s1 [file s1]

**Supplementary Table S1: List of foreground markers and primer sequences**

| S. No. . | genes       | Primer    | Chromosome | Forward sequence             | Reverse sequence             | Expected PCR Product Size | Annealing temperature |
|----------|-------------|-----------|------------|------------------------------|------------------------------|---------------------------|-----------------------|
| 1        | <i>xa13</i> | Xa13 prom | 8          | 5'AGCTCCAGCTCTCCAAATG3'      | 5'GGCCATGGCT CAGTGTTTAT3'    | 300                       | 60°C                  |
| 2        | <i>Xa21</i> | pTA248    | 11         | 5'AGCCGCGGAAGGATAGTTCCCGGA3' | 5'AGACGCGGTAATCGAAAGATGAAA3' | 800                       | 60°C                  |
| 3        | <i>Pi9</i>  | NBS 4     | 6          | 5'ACTTTGTTGTGCTTGA TAAC3'    | 5'ATGGTGAACGG TATCTGTAT3'    | 1000                      | 55°C                  |
| 4        | <i>Pi54</i> | Pi54MAS   | 11         | 5'CAATCTCCAAAGTTTTTCAGG3'    | 5'GCTTCAATCACTGCTAGACC3'     | 216, 360                  | 55°C                  |
| 5        | <i>Gm4</i>  | RM22550   | 8          | 5'GGAGTTAATTCAACCTGTCTG3'    | 5'ACATGCTTGTTAGGCCACACC3'    | 296                       | 55°C                  |
| 6        | <i>Gm1</i>  | RM1328    | 9          | 5'GAATGGGATTAGACGATTTG3'     | 5'CCATGAGTGACATCAAAGG3'      | 204                       | 55°C                  |

**Supplementary Table S2.** Genotyping of F<sub>2</sub> of CO 51 X 562-4 with FGS

| F <sub>2</sub>      | <i>Gm1</i> (RM1328) | <i>Gm4</i> (RM22550) | <i>Pi54</i> (Pi54MAS) | <i>Pi9</i> (NBS4) | <i>xa13</i> ( <i>Xa13</i> prom) | <i>Xa21</i> (pTA248) | Number of <i>QTLs</i> /genes |
|---------------------|---------------------|----------------------|-----------------------|-------------------|---------------------------------|----------------------|------------------------------|
| <b>Progeny# 9-1</b> | +                   | +                    | +                     | +                 | H                               | +                    | 6                            |
| <b>Progeny# 9-2</b> | +                   | H                    | +                     | -                 | H                               | +                    | 5                            |
| <b>Progeny# 9-3</b> | H                   | H                    | H                     | +                 | H                               | -                    | 5                            |
| <b>Progeny# 9-4</b> | H                   | H                    | H                     | +                 | H                               | +                    | 6                            |
| <b>Progeny# 9-5</b> | -                   | -                    | H                     | +                 | +                               | +                    | 4                            |
| <b>Progeny# 9-6</b> | H                   | H                    | -                     | +                 | H                               | -                    | 4                            |
| <b>Progeny# 9-7</b> | +                   | -                    | +                     | +                 | -                               | +                    | 4                            |
| <b>Progeny# 9-8</b> | H                   | +                    | H                     | +                 | H                               | -                    | 5                            |
| <b>Progeny# 9-9</b> | H                   | +                    | +                     | +                 | H                               | +                    | 6                            |

|                      |   |   |   |   |   |   |   |
|----------------------|---|---|---|---|---|---|---|
| <b>Progeny# 9-10</b> | + | + | + | + | H | + | 6 |
| <b>Progeny# 9-11</b> | H | - | H | - | H | + | 4 |
| <b>Progeny# 9-12</b> | - | + | H | + | + | - | 4 |
| <b>Progeny# 9-13</b> | H | + | - | - | H | - | 3 |
| <b>Progeny# 9-14</b> | + | + | + | - | H | + | 5 |
| <b>Progeny# 9-15</b> | H | + | + | - | H | + | 5 |
| <b>Progeny# 9-16</b> | - | + | H | + | H | + | 5 |
| <b>Progeny# 9-17</b> | H | H | H | - | - | + | 4 |
| <b>Progeny# 9-18</b> | H | + | H | + | H | + | 6 |
| <b>Progeny# 9-19</b> | + | H | + | + | + | + | 6 |
| <b>Progeny# 9-20</b> | H | + | H | + | H | + | 6 |
| <b>Progeny# 9-21</b> | H | H | - | - | H | - | 4 |
| <b>Progeny# 9-22</b> | H | - | H | + | - | + | 4 |
| <b>Progeny# 9-23</b> | H | H | H | - | H | + | 5 |
| <b>Progeny# 9-24</b> | H | H | H | + | H | + | 6 |
| <b>Progeny# 9-25</b> | + | + | - | - | - | + | 3 |
| <b>Progeny# 9-26</b> | H | H | - | + | - | + | 4 |
| <b>Progeny# 9-27</b> | H | + | H | + | H | + | 6 |
| <b>Progeny# 9-28</b> | H | H | - | - | H | - | 3 |
| <b>Progeny# 9-29</b> | H | H | + | - | H | + | 5 |
| <b>Progeny# 9-30</b> | H | H | H | + | + | + | 6 |

FGS; Fore Ground Selection, +; Indicate present of *QTLs*/genes, -; Indicate absence of *QTLs*/genes, H; Indicate Heterozygosis of concerned *QTLs*/genes.

**Supplementary Table S3.** Phenotypic scoring of RILs against blast and BLB disease

| S. No | RILs            | Blast Score I in 30 DAS | Blast Score II in 45 DAS | Mean score | BLB Score I in 14 DAI (in cm) | BLB Score II in 21 DAI (in cm) | Mean score (in cm) |
|-------|-----------------|-------------------------|--------------------------|------------|-------------------------------|--------------------------------|--------------------|
| 1     | RIL #9-10-1-1   | 1.8                     | 2.6                      | 2.2        | 0.40                          | 0.71                           | 0.56               |
| 2     | RIL #9-10-10-6  | 3.4                     | 3.0                      | 3.2        | 0.30                          | 0.66                           | 0.48               |
| 3     | RIL #9-10-10-8  | 3.8                     | 3.0                      | 3.4        | 0.31                          | 0.72                           | 0.52               |
| 4     | RIL #9-10-7-17  | 3.8                     | 1.8                      | 2.8        | 0.32                          | 0.42                           | 0.37               |
| 5     | RIL #9-10-7-19  | 2.2                     | 2.2                      | 2.2        | 0.29                          | 0.71                           | 0.50               |
| 6     | RIL #9-10-8-21  | 4.2                     | 3.8                      | 4.0        | 0.34                          | 0.79                           | 0.57               |
| 7     | RIL #9-10-8-23  | 1.8                     | 1.8                      | 1.8        | 0.32                          | 0.42                           | 0.37               |
| 8     | RIL #9-10-8-25  | 2.2                     | 1.4                      | 1.8        | 0.37                          | 0.79                           | 0.58               |
| 9     | RIL #9-9-4-30   | 2.2                     | 1.8                      | 2.0        | 0.25                          | 0.35                           | 0.30               |
| 10    | RIL #9-9-2-31   | 2.6                     | 2.2                      | 2.4        | 0.30                          | 0.73                           | 0.52               |
| 11    | RIL #9-9-2-32   | 2.2                     | 3.0                      | 2.6        | 0.33                          | 0.64                           | 0.49               |
| 12    | RIL #9-9-2-34   | 3.4                     | 3.8                      | 3.6        | 0.26                          | 0.36                           | 0.31               |
| 13    | RIL #9-9-2-35   | 1.8                     | 2.2                      | 2.0        | 0.26                          | 0.36                           | 0.31               |
| 14    | RIL #9-9-13-61  | 1.8                     | 2.2                      | 2.0        | 0.33                          | 0.43                           | 0.38               |
| 15    | RIL #9-20-2-96  | 1.4                     | 3.4                      | 2.4        | 0.35                          | 0.45                           | 0.40               |
| 16    | RIL #9-20-2-97  | 1.4                     | 3.4                      | 2.4        | 0.26                          | 0.36                           | 0.31               |
| 17    | RIL #9-20-2-98  | 1.4                     | 2.2                      | 1.8        | 0.29                          | 0.39                           | 0.34               |
| 18    | RIL #9-20-2-99  | 1.0                     | 2.2                      | 1.6        | 0.28                          | 0.38                           | 0.33               |
| 19    | RIL #9-20-2-100 | 1.0                     | 2.2                      | 1.6        | 0.29                          | 0.39                           | 0.34               |
| 20    | RIL #9-20-7-102 | 1.0                     | 2.6                      | 1.8        | 0.24                          | 0.34                           | 0.29               |
| 21    | RIL #9-20-9-112 | 0.6                     | 1.8                      | 1.2        | 0.26                          | 0.36                           | 0.31               |
| 22    | RIL #9-10-9-145 | 1.6                     | 1.8                      | 1.7        | 0.29                          | 0.68                           | 0.49               |
| 23    | RIL #9-10-9-146 | 1.0                     | 1.8                      | 1.4        | 0.36                          | 0.77                           | 0.57               |
| 24    | RIL #9-10-9-149 | 3.8                     | 1.8                      | 2.8        | 0.34                          | 0.78                           | 0.56               |
| 25    | RIL #9-10-9-150 | 2.2                     | 1.8                      | 2.0        | 0.31                          | 0.41                           | 0.36               |
| 26    | RIL #9-10-9-152 | 1.4                     | 1.8                      | 1.6        | 0.43                          | 0.53                           | 0.48               |

|    |              |      |      |      |       |       |       |
|----|--------------|------|------|------|-------|-------|-------|
| 27 | CO 51        | 4.4  | 5.9  | 5.2  | 7.49  | 12.32 | 9.91  |
| 28 | 562-4        | 1.3  | 2.3  | 1.8  | 0.23  | 0.34  | 0.29  |
| 29 | CO 39        | 6.8  | 9.9  | 8.4  | -     | -     | -     |
| 30 | TN 1         | -    | -    | -    | 15.00 | 19.82 | 17.41 |
| 31 | Mean of RILs | 2.1  | 2.4  | 2.2  | 0.3   | 0.5   | 0.4   |
| 32 | SD           | 1.09 | 0.94 | 0.88 | 1.36  | 2.23  | 1.80  |
| 33 | SE           | 0.21 | 0.18 | 0.17 | 0.26  | 0.42  | 0.34  |

DAS; Days After Sowing, DAI; Days After Inoculation, BLB; Bacterial Leaf Blight, CO 39 and TN 1 have been used as Blast and BLB Screening respectively; SD- Standard Deviation, SE; Standard Error.

**Supplementary Table S4.** Agro-morphological performance of RILs population

| <b>RILs of CO 51 X 562-4</b> | <b>PH<br/>(cm)</b> | <b>NT</b> | <b>NPT</b> | <b>FLL<br/>(cm)</b> | <b>FLW<br/>(cm)</b> | <b>PL<br/>(cm)</b> | <b>DFB</b> | <b>GL<br/>(mm)</b> | <b>GW<br/>(mm)</b> | <b>Total<br/>Grain</b> | <b>FG</b> | <b>CG</b> | <b>F%</b> | <b>1000g<br/>WT</b> | <b>SPY<br/>(g)</b> |
|------------------------------|--------------------|-----------|------------|---------------------|---------------------|--------------------|------------|--------------------|--------------------|------------------------|-----------|-----------|-----------|---------------------|--------------------|
| <b>RIL #9-10-8-23</b>        | 89.71              | 24.92     | 23.01      | 27.45               | 1.11                | 24.02              | 92.0       | 5.48               | 1.85               | 146.50                 | 137.50    | 9.00      | 93.87     | 19.91               | 37.35              |
| <b>RIL #9-10-8-25</b>        | 88.40              | 23.50     | 22.00      | 27.60               | 1.08                | 24.41              | 91.9       | 5.49               | 1.88               | 179.00                 | 167.50    | 11.50     | 93.58     | 20.38               | 35.23              |
| <b>RIL #9-20-2-98</b>        | 90.20              | 23.80     | 22.00      | 28.17               | 1.00                | 25.21              | 91.5       | 5.45               | 1.89               | 163.50                 | 156.00    | 7.50      | 95.44     | 22.76               | 36.45              |
| <b>RIL #9-20-2-99</b>        | 83.30              | 24.30     | 25.30      | 27.90               | 1.14                | 24.52              | 92.5       | 5.44               | 1.85               | 162.00                 | 155.50    | 6.50      | 95.99     | 15.50               | 30.22              |
| <b>RIL #9-20-2-100</b>       | 78.10              | 24.30     | 22.60      | 28.11               | 1.07                | 23.65              | 91.5       | 5.69               | 1.83               | 157.50                 | 148.50    | 9.00      | 94.29     | 17.67               | 29.97              |
| <b>RIL #9-20-7-102</b>       | 83.80              | 22.60     | 22.30      | 29.39               | 1.15                | 25.48              | 91.5       | 5.69               | 1.92               | 148.50                 | 141.00    | 7.50      | 94.93     | 18.42               | 34.26              |
| <b>RIL #9-20-9-112</b>       | 88.20              | 24.20     | 23.30      | 28.85               | 1.17                | 25.85              | 92.5       | 5.82               | 1.85               | 171.00                 | 164.00    | 7.00      | 95.91     | 16.19               | 31.82              |
| <b>RIL #9-10-9-145</b>       | 88.80              | 22.70     | 21.30      | 29.42               | 1.11                | 26.16              | 93.0       | 5.64               | 1.92               | 144.00                 | 136.50    | 7.50      | 94.78     | 22.01               | 32.01              |
| <b>RIL #9-10-9-146</b>       | 90.10              | 21.60     | 17.50      | 30.64               | 1.03                | 26.35              | 91.5       | 5.29               | 1.90               | 152.50                 | 144.50    | 8.00      | 94.77     | 23.28               | 42.21              |

|                              |              |              |              |              |             |              |             |             |             |               |               |              |              |              |              |
|------------------------------|--------------|--------------|--------------|--------------|-------------|--------------|-------------|-------------|-------------|---------------|---------------|--------------|--------------|--------------|--------------|
| <b>RIL #9-10-9-152</b>       | 84.60        | 23.60        | 22.00        | 25.03        | 1.08        | 23.53        | 92.0        | 5.60        | 1.88        | 175.00        | 163.50        | 11.50        | 93.46        | 20.74        | 33.03        |
| <b>BIL #6-17-5-18-29-1-1</b> | 85.33        | 25.72        | 24.97        | 28.34        | 1.07        | 25.49        | 93.5        | 5.67        | 1.88        | 155.08        | 133.02        | 22.06        | 85.87        | 20.45        | 36.52        |
| <b>BIL #6-17-5-18-29-1-2</b> | 85.60        | 25.79        | 24.20        | 28.49        | 1.11        | 25.45        | 92.4        | 5.65        | 1.89        | 152.36        | 135.80        | 16.56        | 89.15        | 19.51        | 38.71        |
| <b>BIL #6-17-5-18-29-1-3</b> | 84.45        | 26.28        | 23.66        | 26.57        | 1.03        | 23.29        | 92.8        | 5.48        | 1.90        | 157.82        | 137.14        | 20.68        | 86.88        | 19.21        | 34.69        |
| <b>BIL #6-17-5-18-29-1-5</b> | 86.27        | 25.77        | 24.84        | 29.17        | 1.17        | 23.89        | 93.4        | 5.56        | 1.91        | 145.66        | 132.16        | 13.50        | 90.71        | 18.50        | 42.94        |
| <b>BIL #6-17-5-18-29-1-6</b> | 86.90        | 26.60        | 25.60        | 28.24        | 1.11        | 24.51        | 94.5        | 5.67        | 1.93        | 154.20        | 137.90        | 16.30        | 89.42        | 21.08        | 42.02        |
| <b>BIL #6-17-5-18-29-1-7</b> | 86.49        | 25.95        | 25.37        | 28.76        | 1.14        | 24.36        | 91.5        | 5.69        | 1.93        | 145.66        | 130.98        | 14.68        | 90.11        | 22.05        | 34.61        |
| <b>BIL #6-17-5-18-29-1-9</b> | 87.03        | 25.76        | 23.59        | 28.13        | 1.17        | 24.88        | 92.8        | 5.59        | 1.94        | 139.60        | 123.72        | 15.88        | 88.63        | 21.52        | 36.30        |
| <b>BIL #6-17-5-21-19-1-1</b> | 88.74        | 26.56        | 26.38        | 28.88        | 1.10        | 25.87        | 92.6        | 5.64        | 1.85        | 142.10        | 126.60        | 15.50        | 88.92        | 19.43        | 34.22        |
| <b>BIL #6-17-5-21-19-4-1</b> | 85.14        | 24.55        | 21.98        | 27.08        | 1.13        | 24.76        | 93.1        | 5.60        | 1.86        | 143.20        | 128.78        | 14.42        | 89.73        | 20.58        | 33.47        |
| <b>BIL #6-17-5-21-19-4-3</b> | 89.90        | 26.26        | 24.54        | 29.03        | 1.07        | 26.93        | 91.4        | 5.33        | 1.91        | 145.00        | 131.62        | 13.38        | 90.52        | 22.4         | 33.29        |
| <b>BIL #6-17-5-21-19-4-9</b> | 87.13        | 24.01        | 22.88        | 28.09        | 1.13        | 25.29        | 92.4        | 5.66        | 1.86        | 145.72        | 133.42        | 12.30        | 91.30        | 23.10        | 35.42        |
| <b>BIL #6-17-5-18-5-1-1</b>  | 84.52        | 25.42        | 23.34        | 27.62        | 1.15        | 25.10        | 92.3        | 5.56        | 1.86        | 160.44        | 146.36        | 14.08        | 91.26        | 23.92        | 40.42        |
| <b>BIL #6-17-5-18-5-1-2</b>  | 86.85        | 23.50        | 22.49        | 26.40        | 1.05        | 24.55        | 93.8        | 5.37        | 1.92        | 154.30        | 137.72        | 16.58        | 89.16        | 21.69        | 39.58        |
| <b>BIL #6-17-5-18-5-1-4</b>  | 85.62        | 24.00        | 22.88        | 27.90        | 1.13        | 22.07        | 92.8        | 5.59        | 1.91        | 145.28        | 132.20        | 13.08        | 90.82        | 23.49        | 42.57        |
| <b>BIL #6-17-5-18-5-1-5</b>  | 87.65        | 23.02        | 21.84        | 27.47        | 1.02        | 24.95        | 92.4        | 5.43        | 1.89        | 146.86        | 132.00        | 14.86        | 89.54        | 22.96        | 43.74        |
| <b>BIL #6-17-5-18-5-1-6</b>  | 85.50        | 23.16        | 21.92        | 28.36        | 1.00        | 24.70        | 92.6        | 5.45        | 1.85        | 148.84        | 133.52        | 15.32        | 89.57        | 18.65        | 33.78        |
| <b>Mean of BILs</b>          | <b>86.45</b> | <b>25.15</b> | <b>23.78</b> | <b>28.03</b> | <b>1.10</b> | <b>24.76</b> | <b>92.7</b> | <b>5.56</b> | <b>1.89</b> | <b>148.88</b> | <b>133.31</b> | <b>15.57</b> | <b>89.47</b> | <b>21.16</b> | <b>37.64</b> |
| <b>CO 51</b>                 | 85.00        | 22.00        | 16.00        | 28.65        | 0.95        | 23.17        | 94.5        | 5.40        | 1.75        | 151.50        | 136.00        | 15.50        | 89.83        | 19.02        | 29.58        |
| <b>562-4</b>                 | 96.00        | 12.50        | 9.50         | 30.75        | 1.20        | 24.70        | 95.0        | 5.70        | 2.26        | 168.00        | 158.50        | 9.50         | 94.29        | 22.21        | 30.45        |
| <b>CD</b>                    | 5.46         | 1.80         | 1.57         | 1.87         | 0.07        | 1.89         | 7.22        | 0.41        | 0.13        | 10.50         | 8.99          | 0.96         | 6.6          | 1.60         | 2.60         |
| <b>SD</b>                    | 2.58         | 1.35         | 1.77         | 1.09         | 0.05        | 1.03         | 0.77        | 0.13        | 0.03        | 10.11         | 11.78         | 4.10         | 2.83         | 2.19         | 3.95         |
| <b>SE</b>                    | 0.28         | 0.28         | 0.37         | 0.21         | 0.05        | 0.21         | 0.08        | 0.05        | 0.02        | 0.82          | 0.99          | 1.14         | 0.30         | 0.48         | 0.66         |

PH: Plant Height, NT: Number of Tillers per plant, NPT: Number of Productive Tillers per plant, FLL: Flag Leaf Length, FLW: Flag leaf width, PL: Panicle Length, DFF: Days to First Flowering, GL: Grain length, GW: Grain Width, FG: Filled Grain, CG: Chaffy grain, F%: fertility percentage, 1000 grain WT: 1000 grain Weight, SPY: Single Plant Yield, cm: centi meter, mm: milli meter, g: grams, CD: Critical Difference, SD: Standard Deviation and SE: Standard Error
